# Supplementary material
Source: PubMed Central journal article supplement (PMC6497167)

## SUPPLEMENTAL DATA

### Stability of ARDS Subphenotypes Over Time in Two Randomized Controlled Trials

#### Authors:

Kevin Delucchi, PhD

Katie R. Famous, MD, PhD

Lorraine B. Ware, MD

Polly E. Parsons, MD

B. Taylor Thompson, MD

Carolyn S. Calfee, MD, MAS

## Supplementary Methods

The variables included in the analyses included both categorical (race, gender, primary ARDS risk factor, and vasopressor use) as well as continuous variables (age, (Interleukin (IL)-8, IL-6, Plasminogen Activator Inhibitor 1 (PAI-1), soluble Tumor Necrosis Factor 1 (sTNF $\alpha$ 1), soluble Intercellular Adhesion Molecule-1 (ICAM-1), von Willebrand factor antigen (vWF), Surfactant Protein D (SP-D), Protein C, total minute ventilation, heart rate, mean airway pressure, temperature, respiratory rate, bilirubin, plateau pressure, creatinine, tidal volume, hematocrit, body mass index, white blood cell count, ratio of partial pressure of arterial oxygen to fraction of inspired oxygen (PaO $_2$ : FiO $_2$ ), partial pressure of arterial carbon dioxide (PaCO $_2$ ), platelets, and systolic blood pressure).

**Table S1: Sample Sizes Available for Analysis at Day 0 and Day 3 in Each Study.**

|                   | ARMA      | ALVEOLI   |
|-------------------|-----------|-----------|
| Day 0 N           | 473       | 549       |
| Day 3 N           | 458 (97%) | 525 (96%) |
| No Day 3 Data     |           |           |
| Died              | 13        | 23        |
| No data collected | 2         | 1         |

**Table S2: Latent Class Analysis of Subjects Enrolled in ARMA at Day 0**

| N<br>Classes | Bayesian<br>Information<br>Criterion | entropy | Number Assigned to Each<br>Subphenotype |         |         |         | p-value* |
|--------------|--------------------------------------|---------|-----------------------------------------|---------|---------|---------|----------|
|              |                                      |         | Class 1                                 | Class 2 | Class 3 | Class 4 |          |
| 1            | 32693.8                              |         | 473                                     |         |         |         |          |
| 2            | 32193.9                              | .80     | 338                                     | 135     |         |         | <.01     |
| 3            | 32006.8                              | .88     | 322                                     | 107     | 44      |         | .61      |
| 4            | 31941.9                              | .91     | 323                                     | 98      | 42      | 10      | .76      |

\* P-value represents the Vuong-Lo-Mendell-Rubin (VLMR) test, which tests if  $k$  classes confer an improved model fit over  $k-1$  classes.

**Table S3: Latent Class Analysis of Subjects Enrolled in ALVEOLI at Day 0**

| N<br>Classes | Bayesian<br>Information<br>Criterion | entropy | Number Assigned to Each<br>Subphenotype |         |         |         | p-value* |
|--------------|--------------------------------------|---------|-----------------------------------------|---------|---------|---------|----------|
|              |                                      |         | Class 1                                 | Class 2 | Class 3 | Class 4 |          |
| 1            | 41360.7                              |         | 549                                     |         |         |         |          |
| 2            | 40579.1                              | .85     | 403                                     | 146     |         |         | .04      |
| 3            | 40215.5                              | .91     | 399                                     | 146     | 4       |         | .33      |
| 4            | 39961.3                              | .93     | 379                                     | 136     | 4       | 20      | .55      |

\* P-value represents the Vuong-Lo-Mendell-Rubin (VLMR) test, which tests if  $k$  classes confer an improved model fit over  $k-1$  classes.

**Table S4: Effect of Active Study Drugs on Day 3 Levels of Key Class-Defining Biomarkers in ARMA**

| Study | Day 3 Measure        | Day 3 Value, Active Drug | Day 3 Value, Placebo | p-value, Drug vs. Placebo* |
|-------|----------------------|--------------------------|----------------------|----------------------------|
| Keto  | IL-6, pg/ml          | 96 (61, 188)             | 96 (67, 144)         | .03                        |
|       | IL-8, pg/ml          | 62 (40, 121)             | 53 (35, 93)          | .77                        |
|       | Protein C, % control | 53 (36, 68)              | 53 (37, 74)          | .81                        |
| Liso  | IL-6, pg/ml          | 82 (24, 145)             | 78.5 (45, 164)       | .87                        |
|       | IL-8, pg/ml          | 20 (20, 35)              | 26 (20, 40)          | .35                        |
|       | Protein C, % control | 73 (47, 101)             | 62 (44, 85)          | .05                        |
|       | TNFr1, pg/ml         | 3512 (2227, 4711)        | 3263 (2099, 7031)    | .21                        |

\* P-value based on parametric test of log-transformed values.

All values displayed as median (25%-75% range).

**Table S5: Effect of Active Study Drugs on Day 3 Levels of Key Class-Defining Biomarkers in ARMA, Stratified By Day 0 Class\***

| Study | Day 3 Measure        | Day 3 Median, Class 1, Active Drug | Day 3 Median, Class 1, Placebo | Day 3 Median, Class 2, Active Drug | Day 3 Median, Class 2, Placebo | p-value, Class-by-Drug Interaction** |
|-------|----------------------|------------------------------------|--------------------------------|------------------------------------|--------------------------------|--------------------------------------|
| Keto  | IL-6, pg/ml          | 83                                 | 90                             | 208                                | 138                            | .02                                  |
|       | IL-8, pg/ml          | 50                                 | 51                             | 128                                | 80                             | .58                                  |
|       | Protein C, % control | 60                                 | 62                             | 41                                 | 39                             | .72                                  |
| Liso  | IL-6, pg/ml          | 71                                 | 66                             | 110                                | 163                            | .77                                  |
|       | IL-8, pg/ml          | 20                                 | 20                             | 37                                 | 72                             | .23                                  |
|       | Protein C, % control | 80                                 | 67                             | 36                                 | 52                             | .07                                  |
|       | TNFr1, pg/ml         | 3051                               | 2539                           | 3961                               | 7032                           | .13                                  |

\* All classes assigned for this table by Day 0 data

\*\* P-value based on parametric test of log-transformed values.

**Table S6: Clinical and Biological Phenotype of Each Class at Day 0 and Day 3 in ARMA, Selected Variables**

|                             | Day 0                |                      | Day 3                |                     |
|-----------------------------|----------------------|----------------------|----------------------|---------------------|
|                             | Class 1<br>(N = 338) | Class 2<br>(N = 135) | Class 1<br>(N = 321) | Class 2<br>N = 137) |
| Minute ventilation, L/min   | 12.3 ± 3.5           | 15.9 ± 4.7           | 12.1 ± 3.3           | 14.8 ± 3.4          |
| Plateau pressure, cm H2O    | 28 ± 7               | 33 ± 8               | 24 ± 6               | 29 ± 7              |
| PF ratio, mm Hg             | 139 ± 60             | 115 ± 57             | 176 ± 70             | 129 ± 63            |
| Systolic BP, mm Hg (lowest) | 93 ± 19              | 78 ± 17              | 107 ± 23             | 90 ± 26             |
| Heart rate, bpm (highest)   | 87 ± 16              | 99 ± 20              | 97 ± 18              | 102 ± 16            |
| Platelets, thousands        | 178 ± 127            | 130 ± 100            | 168 ± 116            | 106 ± 90            |
| PaCO <sub>2</sub> , mm Hg   | 38 ± 8               | 34 ± 9               | 43 ± 11              | 42 ± 12             |
| Creatinine, mg/dL           | 1.0 (0.7, 1.5)       | 1.6 (1.0, 2.6)       | 0.8 (0.6, 1.1)       | 1.9 (1.2, 3.7)      |
| Bilirubin, mg/dL            | 0.9 (0.6, 1.8)       | 1.4 (0.7, 3.2)       | 0.4 (0, 1.0)         | 1.1 (0, 3.1)        |
| ICAM-1, ng/mL               | 523 (302, 845)       | 878 (607, 1382)      | 514 (336, 898)       | 1017 (636 1943)     |
| vWF, % control              | 249 (163, 396)       | 388 (251, 599)       | 283 (167, 416)       | 387 (290, 529)      |
| PAI-1, ng/mL                | 56 (37, 94)          | 130 (71, 342)        | 46 (33, 89)          | 73 (41, 171)        |
| Protein C, % control        | 53 (39, 70)          | 30 (23, 44)          | 60 (47, 81)          | 37 (26, 50)         |



|               |                      |                       |                      |                         |
|---------------|----------------------|-----------------------|----------------------|-------------------------|
| IL-8, pg/mL   | 28 (20, 62)          | 113 (57, 360)         | 20 (20, 46)          | 86 (38, 161)            |
| IL-6, pg/mL   | 172 (83, 426)        | 1343 (403, 3027)      | 68 (39, 116)         | 271 (137, 695)          |
| TNFr-1, pg/mL | 2655 (1932,<br>3846) | 5983 (3916,<br>10320) | 2339 (1873,<br>3440) | 8142.5 (5064,<br>14169) |
| SP-D, ng/mL   | 84 (41, 175)         | 81 (39, 146)          | 118 (60, 212)        | 192 (106, 283)          |

Values represent mean  $\pm$  SD or median (25<sup>th</sup>-75<sup>th</sup> percentile).

**Table S7: Clinical and Biological Phenotype of Each Class at Day 0 and Day 3 in ALVEOLI, Selected Variables**

|                                | Day 0 Value          |                      | Day 3 Value          |                      |
|--------------------------------|----------------------|----------------------|----------------------|----------------------|
|                                | Class 1<br>(N = 403) | Class 2<br>(N = 146) | Class 1<br>(N = 394) | Class 2<br>(N = 131) |
| Minute ventilation,<br>L/min   | 11.1 ± 3.1           | 14.7 ± 4.2           | 11.2 ± 3.3           | 13.5 ± 3.6           |
| Plateau pressure,<br>cm H2O    | 26 ± 7               | 29 ± 7               | 24 ± 6               | 27 ± 6               |
| PF ratio, mm Hg                | 133 ± 58             | 113 ± 52             | 196 ± 77             | 155 ± 64             |
| Systolic BP, mm<br>Hg (lowest) | 91 ± 16              | 79 ± 13              | 105 ± 19             | 93 ± 19              |
| Heart rate, bpm<br>(highest)   | 120 ± 22             | 139 ± 24             | 91 ± 18              | 103 ± 17             |
| Platelets,<br>thousands        | 195 ± 125            | 128 ± 107            | 212 ± 126            | 115 ± 115            |
| PaCO <sub>2</sub> , mm Hg      | 40 ± 9               | 36 ± 8               | 43 ± 12              | 41 ± 12              |
| Creatinine, mg/dL              | 1.0 (0.7, 1.7)       | 1.4 (0.9, 2.6)       | 0.9 (0.6, 1.4)       | 1.5 (0.9, 3.2)       |
| Bilirubin, mg/dL               | 0.7 (0.4, 1.2)       | 1.4 (0.6, 2.6)       | 0.6 (0.4, 1.3)       | 2.3 (0.8, 6.5)       |
| ICAM-1, ng/mL                  | 821 (562, 1165)      | 1390 (854,<br>1856)  | 951 (672, 1379)      | 1369 (1038,<br>2051) |
| vWF, % control                 | 359 (223, 54)        | 538 (341, 765)       | 418 (251, 632)       | 565 (367, 817)       |
| PAI-1, ng/mL                   | 46 (27, 88)          | 164 (80, 250)        | 37 (21, 74)          | 73 (42, 174)         |
| Protein C, %<br>control        | 89 (59, 133)         | 37 (22, 70)          | 111 (77, 160)        | 66 (34, 106)         |

|               |                      |                       |                      |                       |
|---------------|----------------------|-----------------------|----------------------|-----------------------|
| IL-8, pg/mL   | 16 (16, 53)          | 162 (81, 552)         | 16 (16, 34)          | 107 (62, 268)         |
| IL-6, pg/mL   | 155 (67, 368)        | 1535 (528,<br>3968)   | 69 (41, 128)         | 302 (131, 774)        |
| TNFr-1, pg/mL | 3462 (2372,<br>6346) | 7985 (4472,<br>14692) | 3440 (2481,<br>5569) | 7786 (4476,<br>18973) |
| SP-D, ng/mL   | 111 (53, 242)        | 77 (43, 159)          | 196 (93, 339)        | 180 (101, 340)        |

Values represent mean  $\pm$  SD or median (25<sup>th</sup>-75<sup>th</sup> percentile).

**Table S8. Mean probabilities of day 0 latent class membership by whether subject changed class from Day 0 to Day 3.**

|         | Day 0 Class |                 | Mean | SD   | p-value |
|---------|-------------|-----------------|------|------|---------|
| ARMA    | 1           | Changed Class   | 0.99 | 0.23 | .09     |
|         |             | Stayed in Class | 0.89 | 0.24 |         |
|         | 2           | Changed Class   | 0.73 | 0.37 | .11     |
|         |             | Stayed in Class | 0.94 | 0.08 |         |
| ALVEOLI | 1           | Changed Class   | 0.98 | 0.05 | .50     |
|         |             | Stayed in Class | 0.95 | 0.16 |         |
|         | 2           | Changed Class   | 0.77 | 0.34 | .21     |
|         |             | Stayed in Class | 0.90 | 0.20 |         |

## Figure Legends:

**Figure S1a:** Differences in standardized values of each continuous variable by class in the ARMA cohort on Day 3 by latent class. The variables are sorted on the basis of the degree of separation between the classes. The y-axis represents standardized variable values, in which all means are scaled to zero and SDs to one. A value of +1 for the standardized variable signifies that the mean value for a given phenotype was one SD higher than the mean value in the cohort as a whole. Mean values are joined by lines to facilitate displaying class profiles. TNFr1=tumor necrosis factor receptor-1. PAI-1=plasminogen activator inhibitor-1. ICAM-1=intercellular adhesion molecule-1. MAP=mean airway pressure. VWF= von Willebrand factor. BMI=body-mass index. SBP=systolic blood pressure. SPD=surfactant protein D. PaCO<sub>2</sub>=partial pressure of carbon dioxide in arterial blood. Plateau=plateau pressure.

**Figure S1b:** Differences in standardized values of each continuous variable by class in the ALVEOLI cohort on Day 3 by latent class. The variables are sorted on the basis of the degree of separation between the classes. The y-axis represents standardized variable values, in which all means are scaled to zero and SDs to one. A value of +1 for the standardized variable signifies that the mean value for a given phenotype was one SD higher than the mean value in the cohort as a whole. Mean values are joined by lines to facilitate displaying class profiles. TNFr1=tumor necrosis factor receptor-1. PAI-1=plasminogen activator inhibitor-1. ICAM-1=intercellular adhesion molecule-1. MAP=mean airway pressure. VWF= von Willebrand factor. BMI=body-mass index. SBP=systolic blood pressure. SPD=surfactant protein D. PaCO<sub>2</sub>=partial pressure of carbon dioxide in arterial blood. Plateau=plateau pressure.

**Figure S2a:** Sankey chart depicting change in class from Day 0 to Day 3, ARMA Cohort.

**Figure S2b:** Sankey chart depicting change in class from Day 0 to Day 3, ALVEOLI Cohort

Figure S1A.

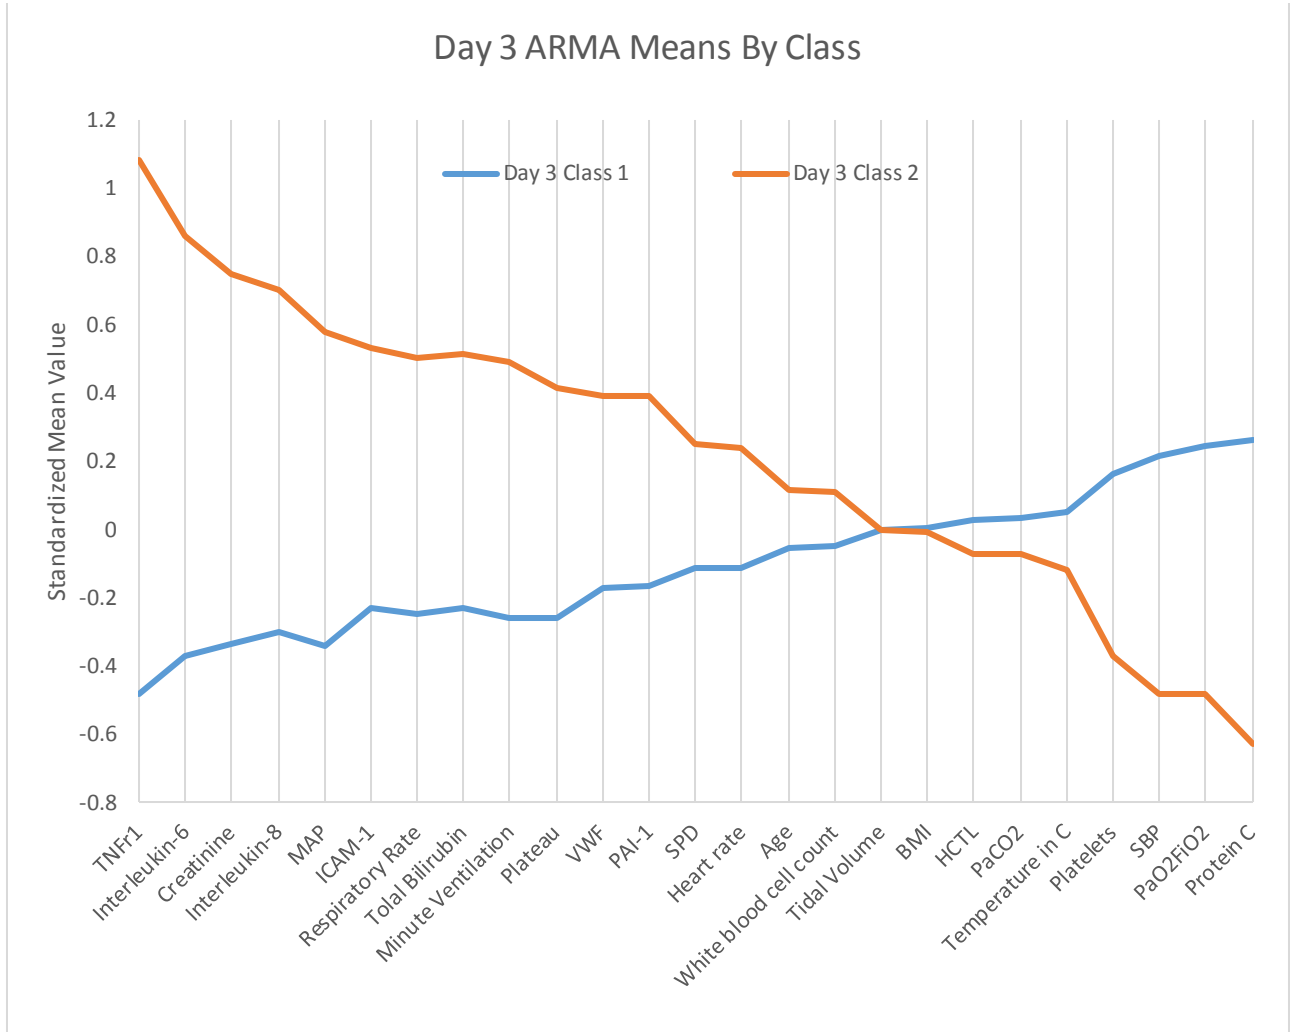

Figure S1B.

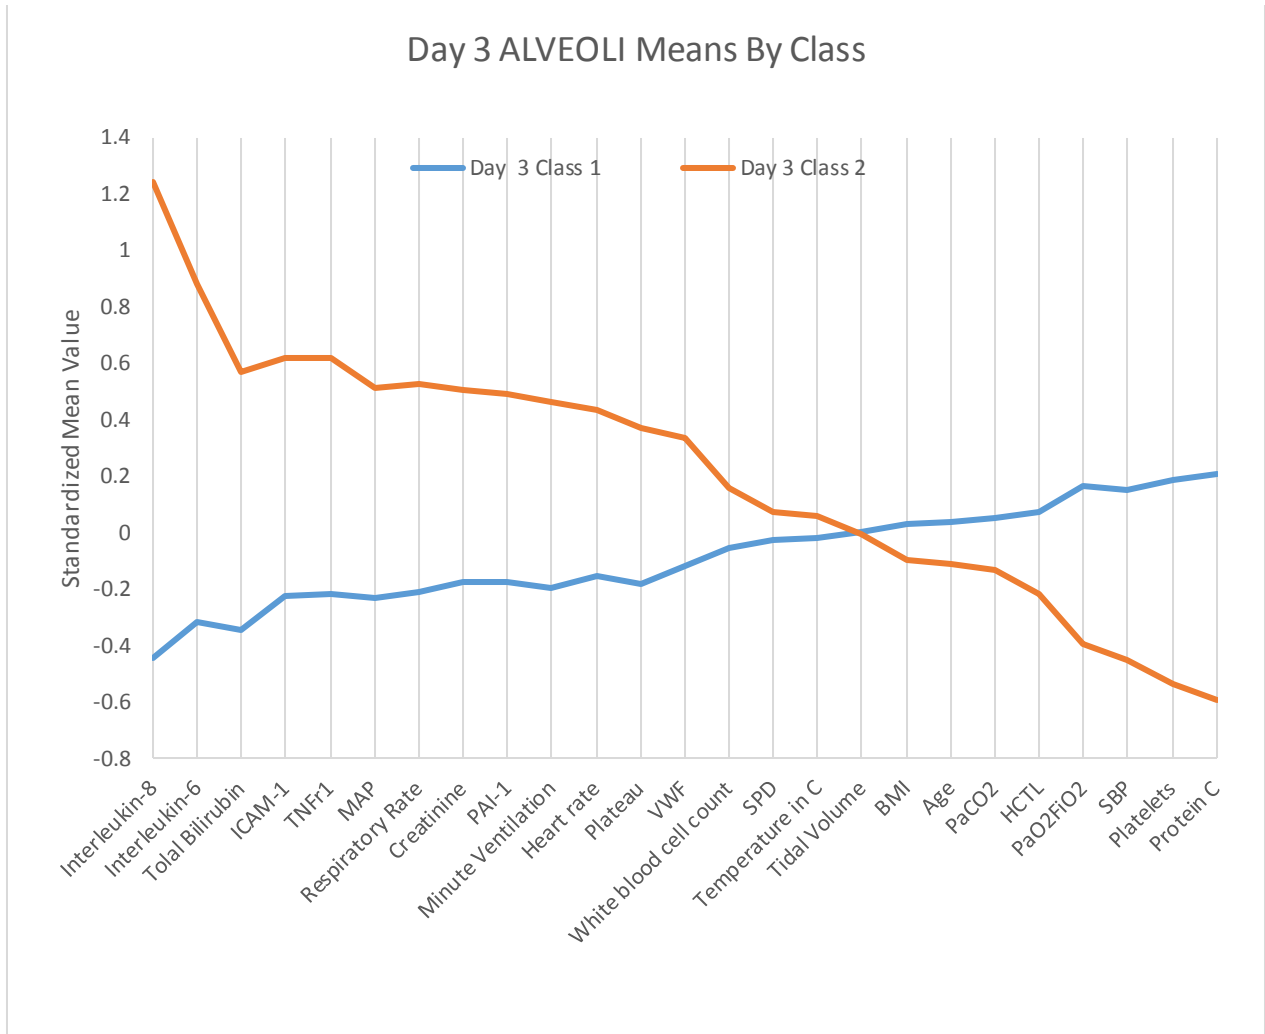

Figure S2a.

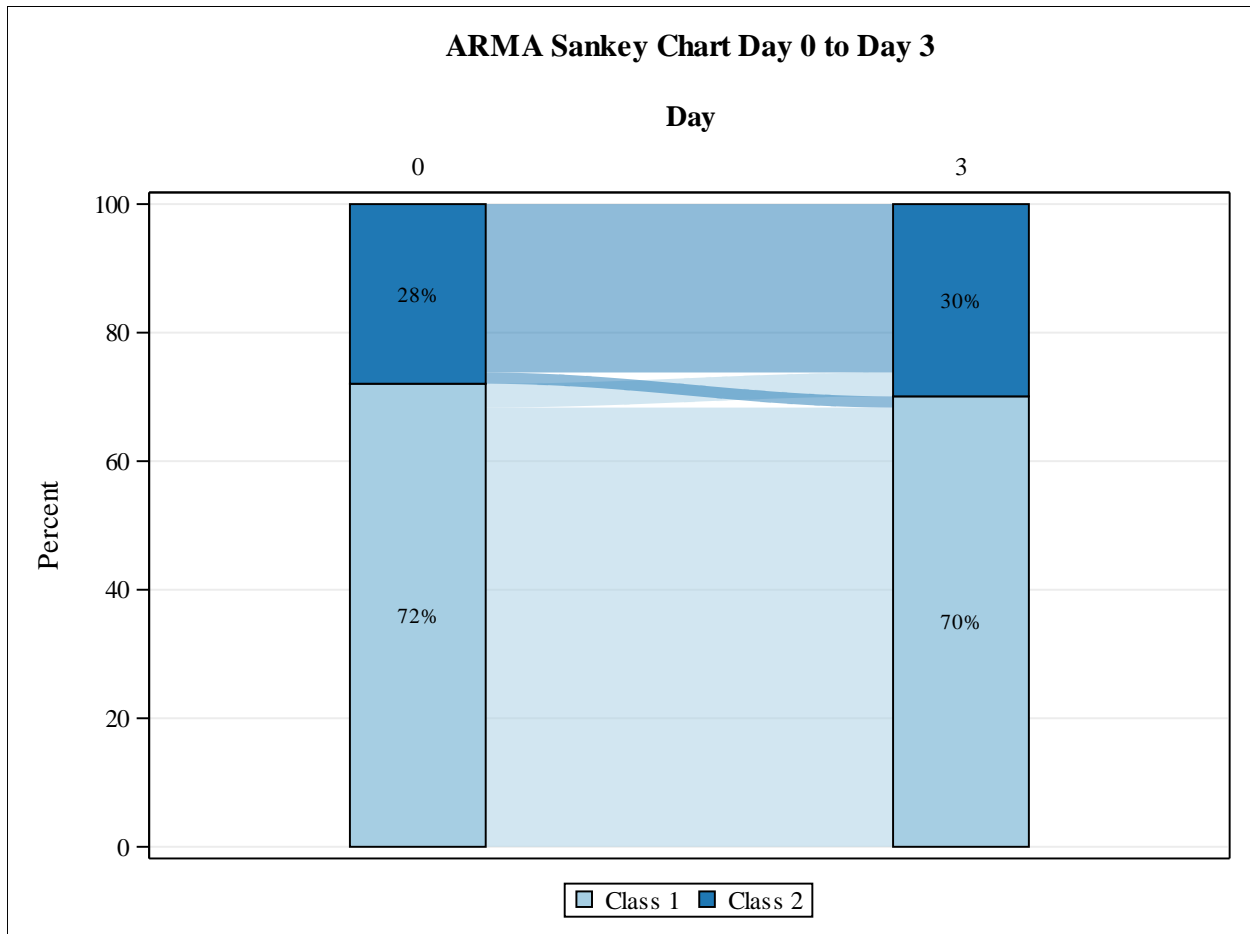



Figure S2b.

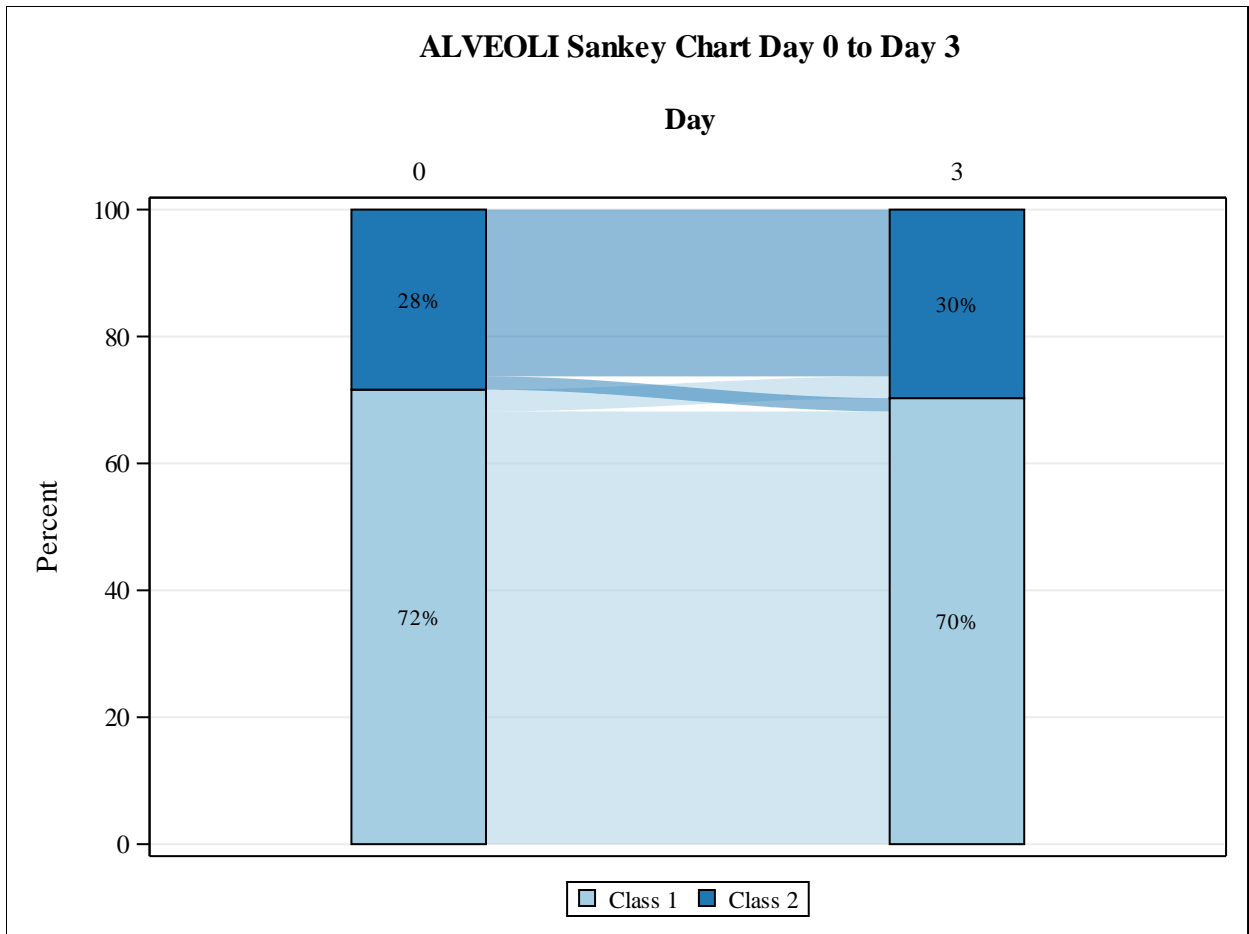

Supplement: NIHMS1003381-supplement-2.pdf [file NIHMS1003381-supplement-2.pdf]
